# Supplementary material for: Electro-oxidation of alcohols over electrochemically activated nickel alloys for energy-saving hydrogen production
Source: Royal Society of Chemistry journal article supplement (doi:10.1039/d4ta02707h), 2024-01-01
Supplement: d4ta02707h1.pdf [file d4ta02707h1.pdf]

## Supporting Information

### Electro-oxidation of Alcohols over Electrochemically Activated Nickel Alloys for Energy-saving Hydrogen Production

Ming Ni,<sup>a</sup> Minyuan Tan,<sup>b</sup> Kang Luo,<sup>c</sup> Daochuan Jiang,<sup>a</sup> Yupeng Yuan,<sup>a</sup> Chuhong Zhu,<sup>a,\*</sup> Haiwei Du,<sup>a,\*</sup> and Hangjuan Ren<sup>d,\*</sup>

<sup>a</sup> *School of Materials Science and Engineering, Anhui University, Hefei 230601, China*

<sup>b</sup> *National Synchrotron Radiation Laboratory, School of Nuclear Science and Technology, University of Science and Technology of China, Hefei 230029, China*

<sup>c</sup> *Shanghai Leading Technology Co. Ltd, Shanghai 201807, China*

<sup>d</sup> *School of Chemistry, Monash University, Clayton, Victoria 3800, Australia*

Corresponding author email:

chzhu@ahu.edu.cn (C. Zhu)

haiwei.du@ahu.edu.cn (H. Du)

hangjuan.ren@monash.edu (H. Ren)

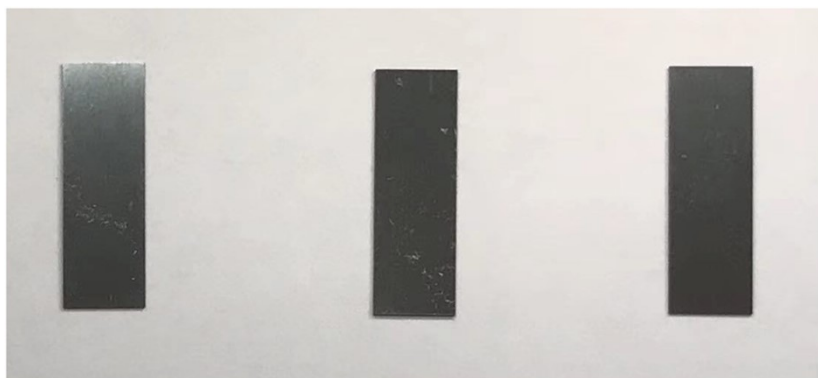

Figure S1 Photographs of the as-prepared Ni alloys before electrochemical activation, with a size of  $1 \times 3 \text{ cm}^2$  and thickness of 0.2 mm.

Table S1 Nanoindentation data of the as-prepared Ni alloy.

| Test point | Hardness (GPa) | Elastic modulus (GPa) |
|------------|----------------|-----------------------|
| 1          | 6.605          | 261.29                |
| 2          | 7.067          | 262.79                |
| 3          | 7.092          | 229.20                |

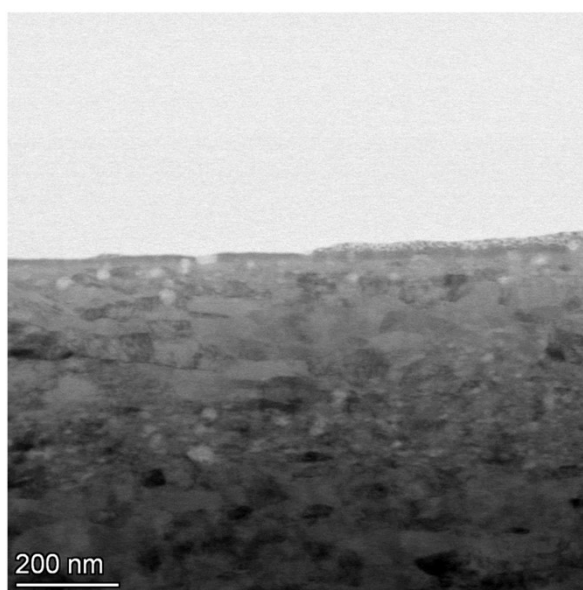

Figure S2 TEM image of the as-prepared Ni alloy before electrochemical activation.

Table S2 Elemental compositions of pristine and activated Ni alloys using ICP-OES.

|                                       | Elemental composition (wt%) <sup>a</sup> |       |       |      |      |
|---------------------------------------|------------------------------------------|-------|-------|------|------|
|                                       | Ni                                       | Cr    | Co    | Mo   | Fe   |
| Pristine Ni alloys                    | 62.11                                    | 20.23 | 12.19 | 7.49 | 0.68 |
| Activated Ni alloy<br>(after 200 CVs) | 62.30                                    | 20.28 | 12.30 | 7.93 | 0.69 |

<sup>a</sup> Average values obtained by two tests.

Table S3 Elemental compositions of the as-prepared Ni alloy using TEM EDX.

| Elements | Atomic fraction (at%) | Mass fraction (wt%) |
|----------|-----------------------|---------------------|
| Ni       | 59.07                 | 58.60               |
| Cr       | 21.68                 | 19.06               |
| Co       | 12.66                 | 12.61               |
| Mo       | 5.19                  | 8.42                |
| Fe       | 1.39                  | 1.32                |

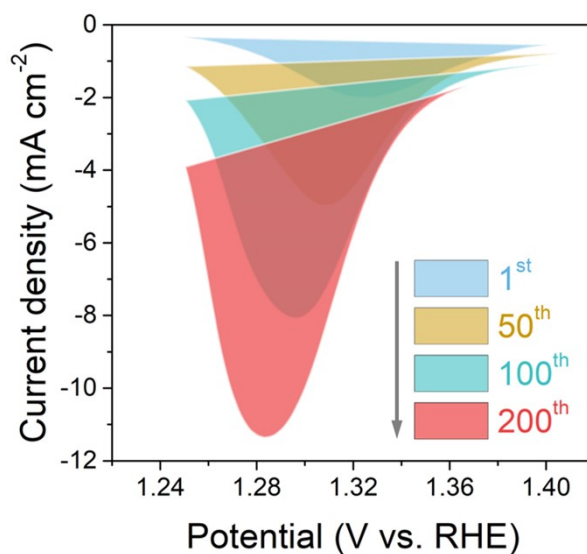

Figure S3 Backward CV curves of Ni alloy by different numbers of electrochemical activation cycles. The integrated area reflects the number of electrochemically active sites.

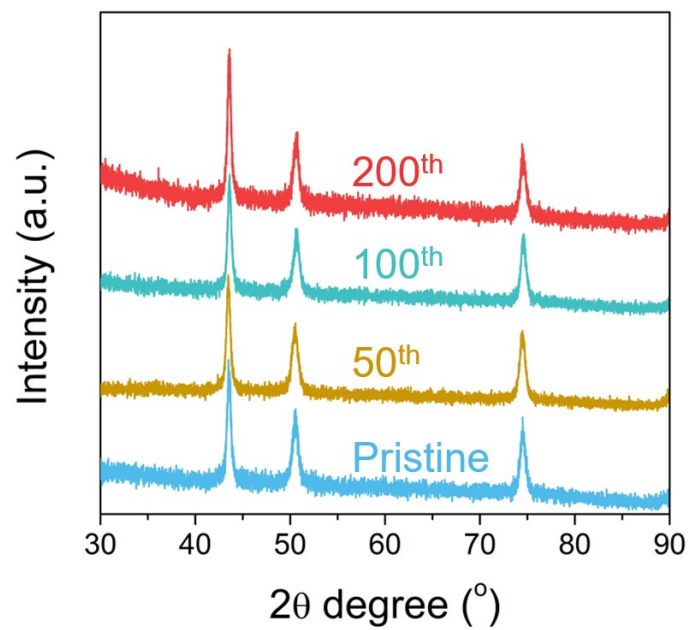

Figure S4 XRD patterns of Ni alloys before and after electrochemical activation through different CV cycles. No peak shift is observed after electrochemical activation.

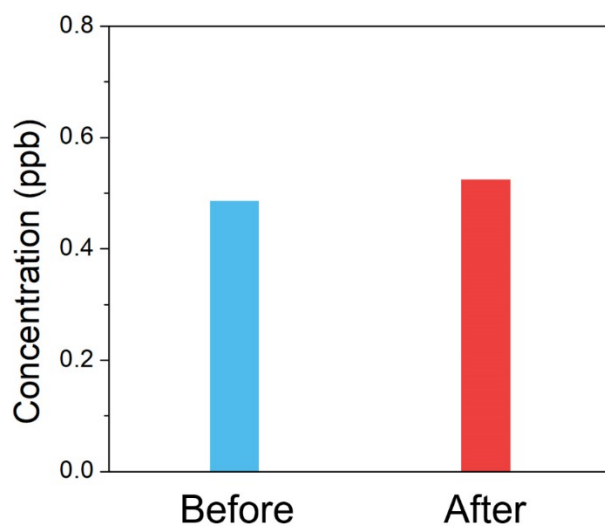

Figure S5 Concentration of metal elements in the solution before and after the total electrochemical activation.

Table S4 ICP-OES analysis of metal ion concentration in the solution before and after the electrochemical activation.

| Metal elements | Concentration in the solution before activation (ppb) | Concentration in the solution after activation (ppb) |
|----------------|-------------------------------------------------------|------------------------------------------------------|
| Fe             | 0.437                                                 | 0.4460                                               |
| Co             | 0.009                                                 | 0.0116                                               |
| Ni             | 0.025                                                 | 0.0430                                               |
| Cr             | 0.009                                                 | 0.0103                                               |
| Mo             | 0.004                                                 | 0.0137                                               |

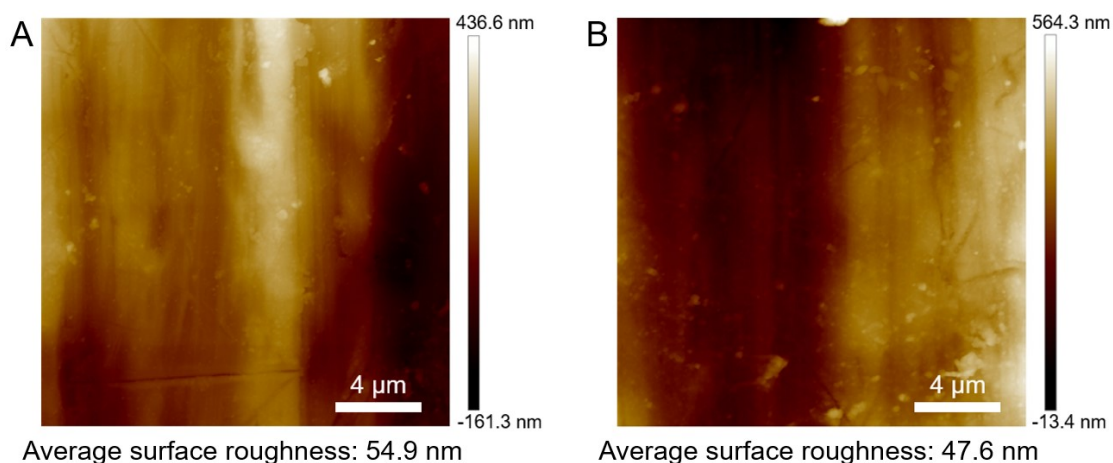

Figure S6 AFM images of the (a) pristine and (b) activated Ni alloys.

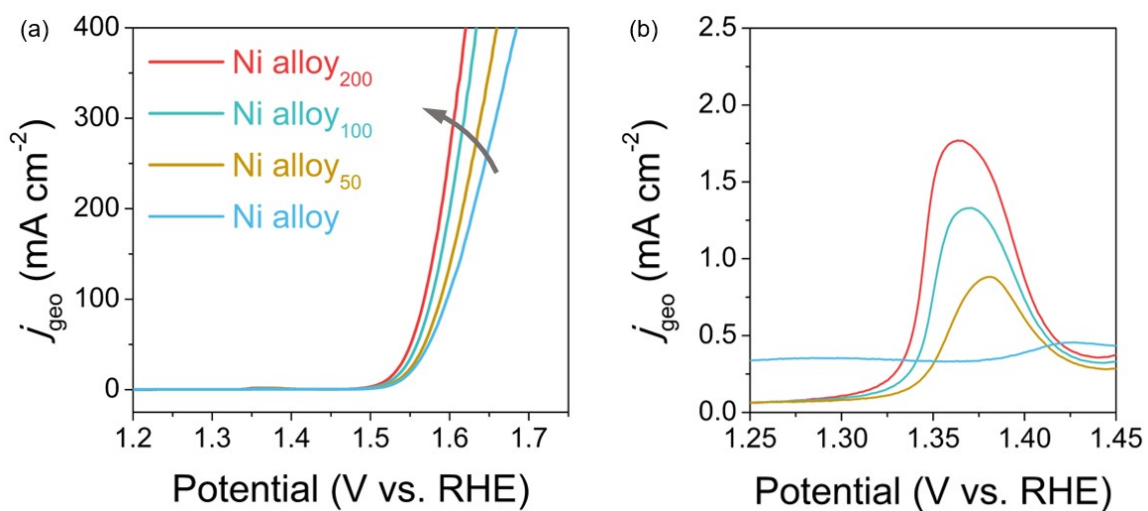

Figure S7 (a) LSV curves of the Ni alloy after different electrochemical activation cycles in 1 M KOH electrolyte at a scan rate of  $5 \text{ mV s}^{-1}$ . (b) The enlarge range between 1.25 ~ 1.45  $V_{\text{RHE}}$ . The oxidation potential of  $\text{Ni}^{2+}/\text{Ni}^{3+}$  negatively shifts with the increasing peak area, indicating the increased amount of  $\text{Ni}^{3+}$  ( $\text{NiOOH}$ ).<sup>1</sup>

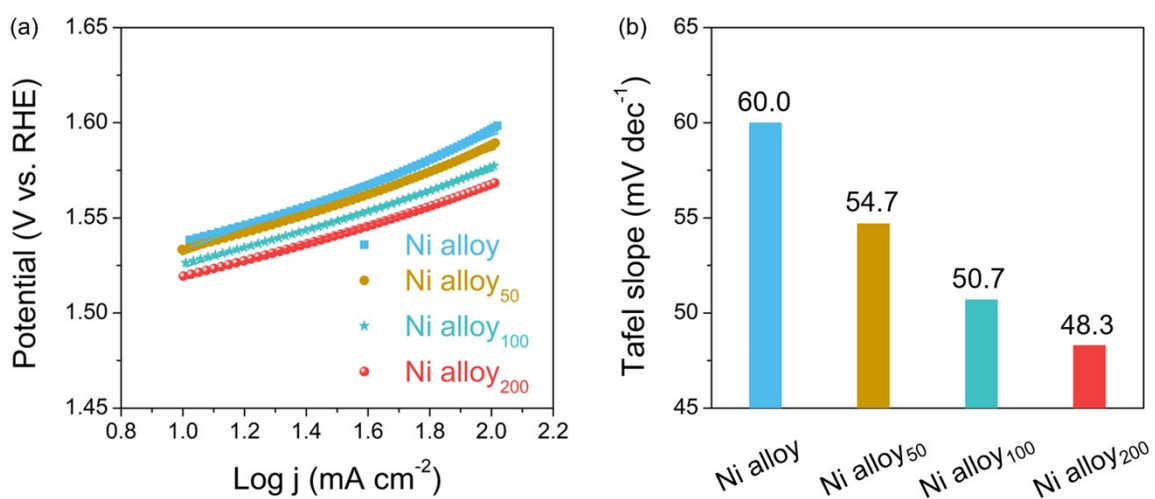

Figure S8 (a) Tafel plots and (b) comparison of Tafel slopes of Ni alloys before and after electrochemical activation.

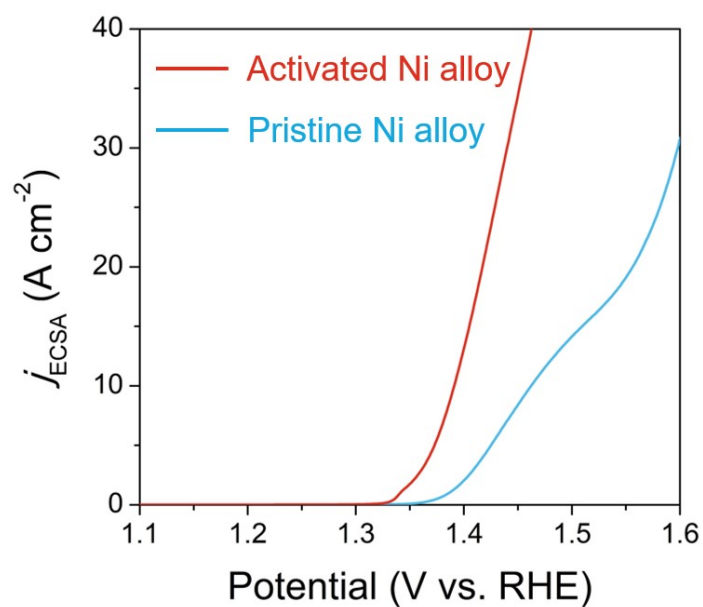

Figure S9 The ECSA normalized LSV curves of the pristine Ni alloy and the activated Ni alloy.

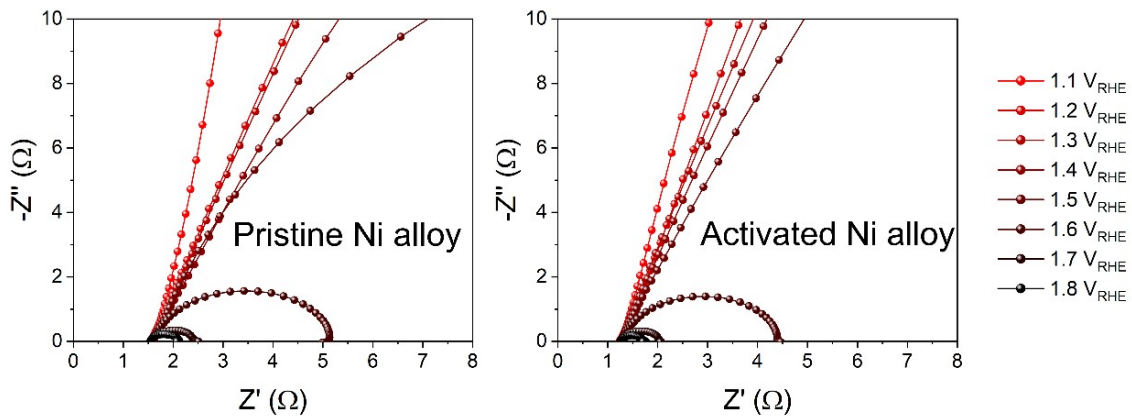

Figure S10 In-situ EIS spectra of the pristine Ni alloy and the activated Ni alloy.

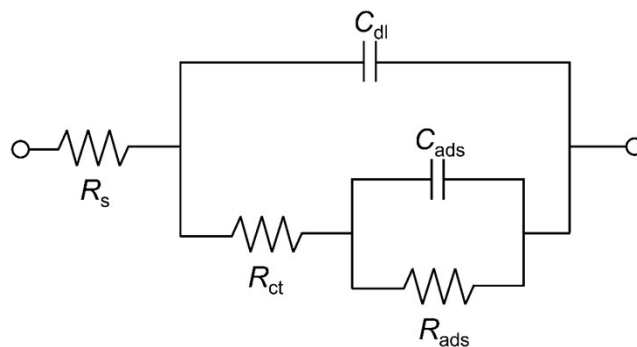

Figure S11 Equivalent circuit model used for EIS analyses.  $R_s$ : solution resistance,  $R_{ct}$ : charge transfer resistance,  $R_{ads}$ : resistance of interfacial adsorption,  $C_{dl}$ : double-layer capacitance,  $C_{ads}$ : capacitance of interfacial adsorption.<sup>2</sup>



Table S5 Resistance and capacitance obtained by analysing the *in-situ* EIS data of pristine Ni alloy and activated Ni alloy electrocatalyst (electrolyte: 1 M KOH).

|                                         | Potential<br>(V <sub>RHE</sub> ) | R <sub>s</sub> (Ω) | R <sub>ct</sub> (Ω) | C <sub>dl</sub> (μF) | C <sub>ads</sub> (μF) | R <sub>ads</sub> (Ω) |
|-----------------------------------------|----------------------------------|--------------------|---------------------|----------------------|-----------------------|----------------------|
| Pristine Ni alloy                       | 1.1                              | 1.377              | 9967.4              | 0.059                | 0.079                 | 9828                 |
|                                         | 1.2                              | 1.363              | 4414                | 0.074                | 0.100                 | 4307                 |
|                                         | 1.3                              | 1.387              | 8399.05             | 0.088                | 0.137                 | 8311                 |
|                                         | 1.4                              | 1.403              | 6103.68             | 0.304                | 0.431                 | 6039                 |
|                                         | 1.5                              | 1.206              | 313.22              | 2.084                | 1.337                 | 262.5                |
|                                         | 1.6                              | 1.138              | 2.491               | 1.419                | 4.380                 | 0.927                |
|                                         | 1.7                              | 1.149              | 0.746               | 1.398                | 1.244                 | 0.746                |
|                                         | 1.8                              | 1.14               | 0.298               | 1.324                | 9.402                 | 0.043                |
| Electrochemically<br>activated Ni alloy | 1.1                              | 1.688              | 1007.2              | 0.068                | 0.122                 | 818                  |
|                                         | 1.2                              | 1.557              | 1011.6              | 0.085                | 0.184                 | 826                  |
|                                         | 1.3                              | 1.629              | 433.2               | 0.113                | 0.440                 | 277                  |
|                                         | 1.4                              | 1.405              | 93.78               | 6.202                | 6.595                 | 27                   |
|                                         | 1.5                              | 1.326              | 49.32               | 6.324                | 4.068                 | 7.7                  |
|                                         | 1.6                              | 1.274              | 3.117               | 3.878                | 5.150                 | 1.902                |
|                                         | 1.7                              | 1.279              | 0.763               | 2.715                | 11.140                | 0.251                |
|                                         | 1.8                              | 1.286              | 0.451               | 2.749                | 835                   | 0.043                |

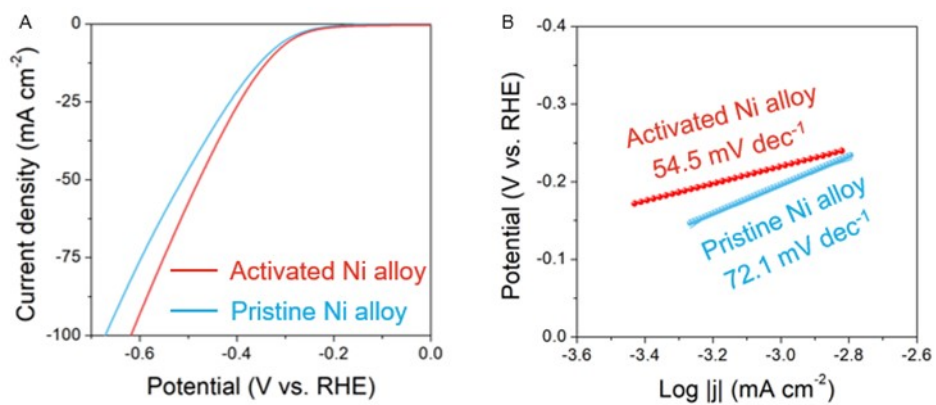

Figure S12 (a) HER LSV curves of pristine and electrochemically activated Ni alloys (electrolyte: 1 M KOH). (b) The corresponding Tafel plots.

Table S6 OER performance comparison between electrochemically activated Ni alloy and other transition metal based electrocatalysts in recently reported studies (electrolyte: 1 M KOH)

| Electrocatalysts                                    | Substrates              | Overpotential @<br>100 mA cm <sup>-2</sup> (mV) | Tafel slope<br>(mV dec <sup>-1</sup> ) | Year        | Ref.             |
|-----------------------------------------------------|-------------------------|-------------------------------------------------|----------------------------------------|-------------|------------------|
| Superwetable Ni <sub>3</sub> S <sub>2</sub> @Ni(II) | Nickel foam             | ~370                                            | 55                                     | 2023        | [3]              |
| a-Ni/CeO <sub>2</sub> @NC                           | Carbon fiber paper      | 396                                             | 49                                     | 2023        | [4]              |
| Co-ZIF/CDs                                          | Carbon cloth            | 401                                             | 147                                    | 2023        | [5]              |
| Co <sub>0.5</sub> Fe <sub>0.5</sub> LDH             | Carbon cloth            | ~569                                            | 64.6                                   | 2023        | [6]              |
| CoO/CeO <sub>2</sub>                                | Nickel foam             | ~377                                            | 84                                     | 2023        | [7]              |
| NiFe/NiFeOOH with AMF                               | Glassy carbon electrode | ~379                                            | 65.0                                   | 2023        | [8]              |
| Ru/Co <sub>3</sub> O <sub>4-x</sub>                 | Glassy carbon electrode | ~442                                            | 86.9                                   | 2023        | [9]              |
| Ir@Zr-CoP                                           | Carbon cloth            | 371                                             | 70.4                                   | 2023        | [10]             |
| H-ONSA                                              | Nickel foam             | ~379                                            | 52.1                                   | 2023        | [11]             |
| Ru FeNi@NLC                                         | Carbon paper            | 340                                             | 72                                     | 2023        | [12]             |
| FeCoCuMnRuB                                         | Glassy carbon electrode | 323                                             | 61                                     | 2024        | [13]             |
| HEP@SWCNTs                                          | Glassy carbon electrode | ~316                                            | 56                                     | 2024        | [14]             |
| <b>Activated Ni alloy</b>                           | <b>Ni alloy</b>         | <b>337</b>                                      | <b>48.3</b>                            | <b>2024</b> | <b>This work</b> |

NC: nitrogen-doped carbon;

CDs: carbon dots;

LDH: layered double hydroxide;

AMF: alternating magnetic field;

ONSA: orthogonal nanosheets with single-crystalline arrays;

HEP: high-entropy metal phosphide;

SWCNTs: single-wall carbon nanotubes;

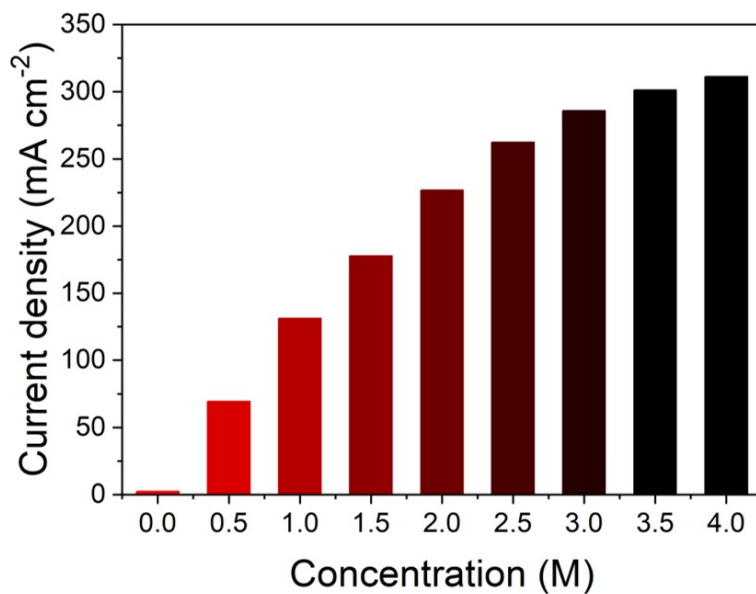

Figure S13 Current densities of the activated Ni alloy recorded at 1.5  $V_{RHE}$  when different concentrations of methanol are added.

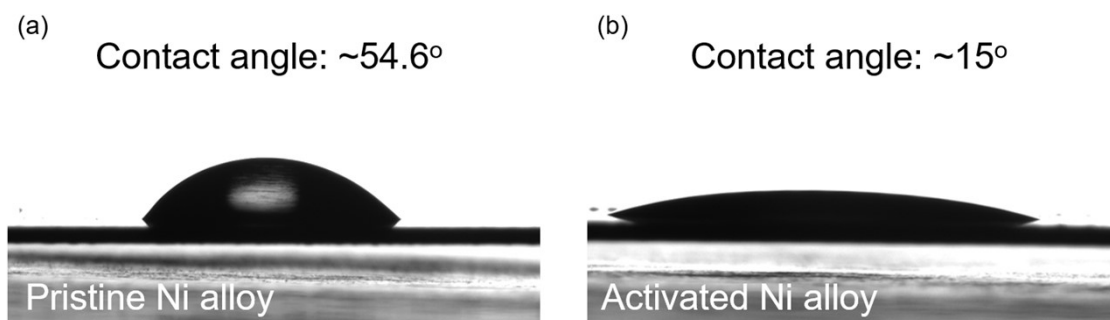

Figure S14 Contact angle measurement of (a) pristine and (b) activated Ni alloy. Solution: 1 M KOH + 2 M MeOH.

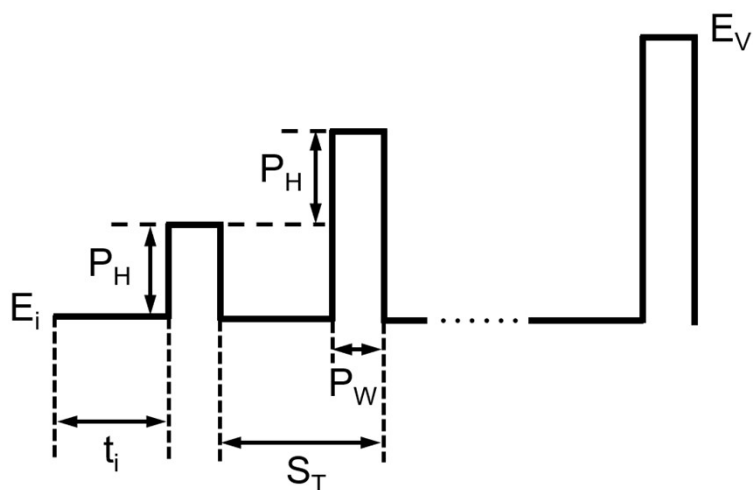

Figure S15 Experimental parameters of normal pulse voltammograms.  $E_i$  (initial potential) = 1.275 V<sub>RHE</sub>;  $P_H$  (pulse height) = 0.1 mV;  $P_W$  (pulse width) = 10 ms;  $t_i$  (initial time) = 300 ms;  $S_T$  (step time) = 300 ms;  $E_V$ : final potential.

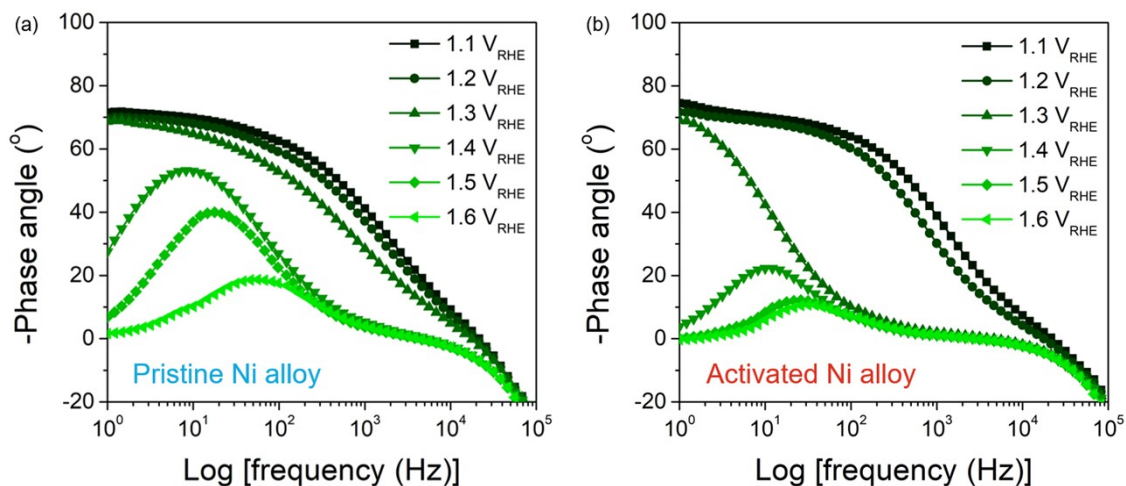

Figure S16 Phase angle variation recorded in 1 M KOH + 2 M MeOH at different potentials: (a) pristine and (b) activated Ni alloy.

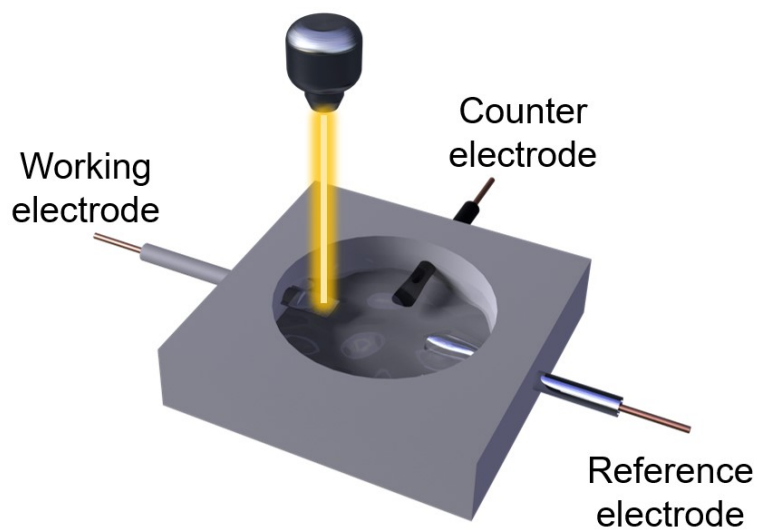

Figure S17 Schematic of setup of *in-situ* Raman test.

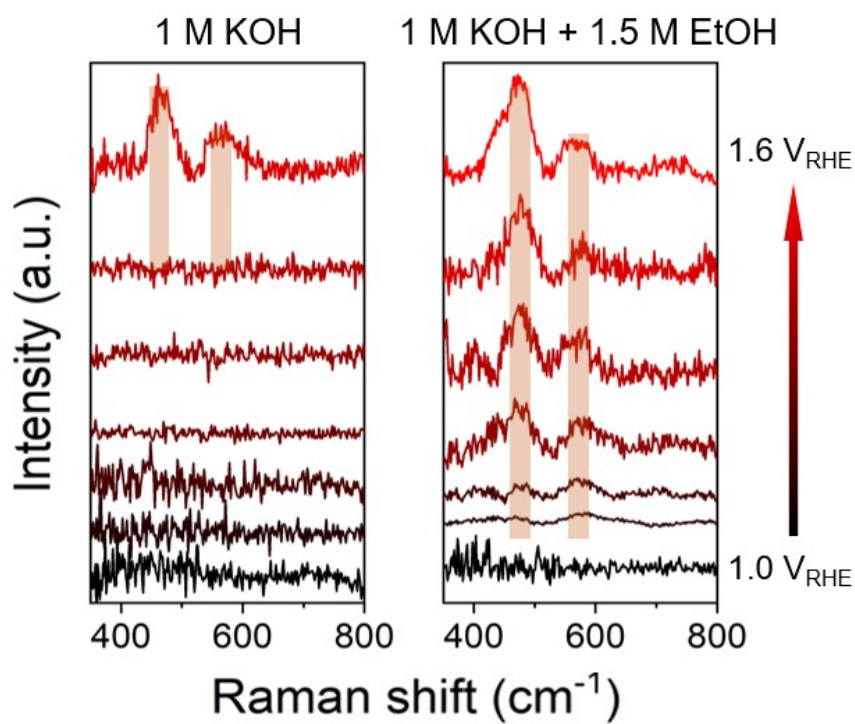

Figure S18 Raw data of *in-situ* Raman spectra of activated Ni alloys recorded in (a) 1 M KOH or (b) 1 M KOH + 1.5 M EtOH.

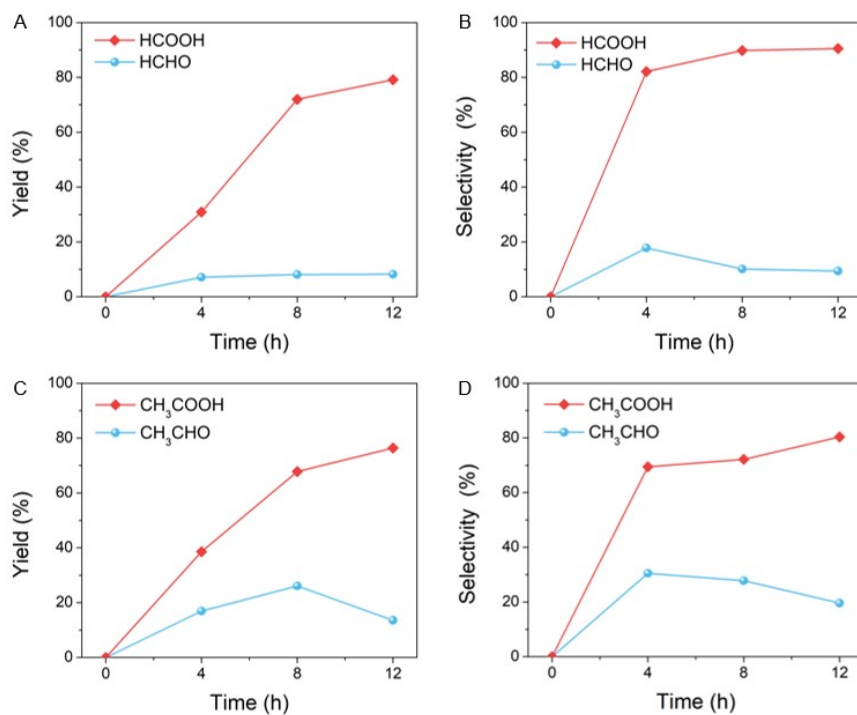

Figure S19 Yield and selectivity of the oxidation products from (a, b) methanol and (c, d) ethanol over the activated Ni alloy.

## References

1. R. A. Márquez, K. Kawashima, Y. J. Son, R. Rose, L. A. Smith, N. Miller, O. A. Carrasco Jaim, H. Celio and C. B. Mullins, *ACS Appl. Mater. Interfaces*, 2022, **14**, 42153-42170.
2. F. Dionigi, Z. Zeng, I. Sinev, T. Merzdorf, S. Deshpande, M. B. Lopez, S. Kunze, I. Zegkinoglou, H. Sarodnik, D. Fan, A. Bergmann, J. Drnec, J. F. d. Araujo, M. Gliech, D. Teschner, J. Zhu, W.-X. Li, J. Greeley, B. R. Cuenya and P. Strasser, *Nat. Commun.*, 2020, **11**, 2522.
3. F. Zhang, R. Zhao, Y. Wang, L. Han, J. Gu, Z. Niu, Y. Yuan, N. Qu, J. Meng and D. Wang, *Chem. Eng. J.*, 2023, **452**, 139513.
4. Z. Pei, H. Zhang, Z.-P. Wu, X. F. Lu, D. Luan and X. W. Lou, *Sci. Adv.*, 2023, **9**, eadh1320.
5. Q. Hong, Y. Wang, R. Wang, Z. Chen, H. Yang, K. Yu, Y. Liu, H. Huang, Z. Kang and P. W. Menezes, *Small*, 2023, **19**, 2206723.
6. S. Shankar Naik, J. Theerthagiri, F. S. Nogueira, S. J. Lee, A. Min, G.-A. Kim, G. Maia, L. M. C. Pinto and M. Y. Choi, *ACS Catal.*, 2023, **13**, 1477-1491.
7. H. Liu, H. Duan, J. Yu, C. Qiu, R. Yu, J. Gao, S. Li, X. Du, Z. Si and S. Yang, *ACS Mater. Lett.*, 2022, **4**, 2572-2578.
8. D. Peng, C. Hu, X. Luo, J. Huang, Y. Ding, W. Zhou, H. Zhou, Y. Yang, T. Yu, W. Lei and C. Yuan, *Small*, 2023, **19**, 2205665.
9. C.-Z. Yuan, S. Wang, K. San Hui, K. Wang, J. Li, H. Gao, C. Zha, X. Zhang, D. A. Dinh, X.-L. Wu, Z. Tang, J. Wan, Z. Shao and K. N. Hui, *ACS Catal.*, 2023, **13**, 2462-2471.
10. Q. P. Ngo, T. T. Nguyen, Q. T. T. Le, J. H. Lee and N. H. Kim, *Adv. Energy Mater.*, 2023, **13**, 2301841.
11. Y. Zou, C. Liu, C. Zhang, L. Yuan, J. Li, T. Bao, G. Wei, J. Zou and C. Yu, *Nat. Commun.*, 2023, **14**, 5780.
12. X. Lin, J. Liu, X. Qiu, B. Liu, X. Wang, L. Chen and Y. Qin, *Angew. Chem. Int. Ed.*, 2023, **62**, e202306333.
13. L. Liu, T. Liu, C. Xu, W. Zhao, J. Fan, J. Liu, X. Ma and W. Fu, *Nano Lett.*, 2024, **24**, 2831-2838.
14. J. Du, S. Liu, Y. Liu, G. Wu, X. Liu, W. Zhang, Y. Zhang, X. Hong, Q. Li and L. Kang, *J. Am. Chem. Soc.*, 2024, **146**, 8464-8471.
